# Supplementary material
Source: publisher figshare collection journal article supplement (https://frontiersin.figshare.com/ndownloader/files/26632580)
Supplement: Supplementary file 1 [file 26632580]

**Table 1a**. Summary of generalized additive models for per article rates of accretion of new topics, species, and ecoregions each year. % Dev = percent of the deviance explained by the model. G.O.F. *P* = *P*-values from simulated residual-variance estimates.

| Response | *F* | Smooth *P* | % Dev | *K*-index | G.O.F. *P* |
| --- | --- | --- | --- | --- | --- |
| Topic | 35.95 | <<0.00001 | 58.4 | 0.95 | 0.81 |
| Species | 23.75 | 0.00004 | 49.7 | 0.98 | 0.41 |
| Ecoregion | 86.23 | <<0.00001 | 92.3 | 0.96 | 0.28 |

**Table 1b**. Summary of generalized additive models for Shannon’s *H* against year. Response categories from which *H* was computed include topics listed in Table 1, major taxa (mammals; birds; reptiles and amphibians; fishes and invertebrates; plants and fungi), mammalian orders (Carnivora; Primates; Rodentia; Lagomorpha; ungulates = Perissodactyla and Artiodactyla; other small mammals = Afrosoricida, Chiroptera, Erinaceomorpha, Macroscelidea, Microbiotheria, Peramelemorphia, Scandentia, and Soricomorpha; other mammals = Cetacea, Cingulata, Dasyuromorphia, Dermoptera, Didelphimorphia, Diprotodontia, Hyracoidea, Monotremata, Pholidota, Pilosa, Proboscidea, and Tubulidentata), and families of Carnivora (Felidae; Canidae; marine carnivores = Phocidae and Otariidae; Ursidae; Viverridae; Hyaenidae; Mephitidae; Herpestidae; Mustelidae; Procyonidae; other carnivores = Ailuridae, Eupleridae, and Nandiniidae). % Dev = percent of the deviance explained by the model. G.O.F. *P* = *P*-values from simulated residual-variance estimates.

| Response | *F* | Smooth *P* | % Dev | *K*-index | G.O.F. *P* |
| --- | --- | --- | --- | --- | --- |
| Topic | 8.96 | 0.0030 | 85.3 | 1.47 | 0.95 |
| Major Taxa | 3.95 | 0.0520 | 67.5 | 1.80 | 1.00 |
| Mammal Order | 2.67 | 0.1130 | 42.7 | 1.46 | 0.92 |
| Carnivore Family | 3.85 | 0.0410 | 66.3 | 1.13 | 0.53 |
| Biome | 14.5 | 0.0006 | 90.2 | 1.66 | 0.97 |

**Table 1c**. Generalized additive model to estimate trends in probability of occurrence of anthropogenic habitat in camera-trapping studies over time. % Dev = percent of the deviance explained by the model. G.O.F. *P* = *P*-values from simulated residual-variance estimates.

| *X*2 Smooth | Smooth *P* | % Dev | *K*-index | G.O.F. *P* |
| --- | --- | --- | --- | --- |
| 11.75 | 0.011 | 0.74 | 0.89 | 0.005 |

**Table 1d**. Summary of quantile generalized additive models for effort metrics against year. % Dev = percent of the deviance explained by the model. G.O.F. *P* = *P*-values from simulated residual-variance estimates.

| Response | Quantile | *X*2 Smooth | Smooth *P* | % Dev | *K*-index | G.O.F. *P* |
| --- | --- | --- | --- | --- | --- | --- |
| Camera Days | 90 | 36.1 | <<0.00001 | 18.3 | 0.90 | 0.19 |
|  | 50 | 25.8 | <<0.00001 | 23.1 | 0.93 | ​0.64 |
| Area Sampled | 90 | 11.9 | 0.0008 | 2.7 | 0.90 | 0.085 |
|  | 50 | 29.5 | <<0.00001 | 36.4 | 0.85 | 0.085 |
| Temp Extent | 90 | 12.9 | 0.0004 | 29.3 | 0.80 | 0.43 |
|  | 50 | 0.9 | 0.3600 | 13.1 | 0.95 | 0.36 |
| Temp Intensity | 90 | 1.2 | 0.2770 | 55.3 | 0.60 | 0.16 |
|  | 50 | 9.0 | 0.0200 | 2.6 | 0.98 | 0.45 |
